# Supplementary material for: How equitable is digital rehabilitation for people after stroke? A systematic review using an equity approach
Source: Front Digit Health. 2025 Jun 24;7:1544754. doi: 10.3389/fdgth.2025.1544754 (PMC12234467; doi:10.3389/fdgth.2025.1544754)
Supplement: Supplementary file 1 [file Table1.xlsx]

## Sheet: Combined dataset
combined data ID	all article ID	key	title	journal	authors	abstract	DHT categories	upper/lower limb	year	Country	Sample size	Primary target	Secondary target	No groups	Experimental group	Control/group2	Control/group3	Control/group4	Residence_InC	Residence_EX	Residence_Base	Ethnic_INC	Ethnic_EX	Ethnic_Base	Occupation_INC	Occupation_Ex	Occupation_Base	Gender_INC	Gender_EX	Gender_Base	Religion_INC	Religion_EX	Religion_Base	Educ_INC	Educ_EX	Educ_Base	SES_IC	SES_EX	SES_Base	Social Capital_INC	Social capital_EX	Social capital_BASE	Age_INC	AGE_EX	Age_Base	Disability_INC	Disability_EX	Disability_Base	relationship_INC
1	5	rayyan-395827146	Stepping training with external feedback relating to lower limb support ability effectively improved complex motor activity in ambulatory patients with stroke: a randomized controlled trial	European journal of physical & rehabilitation medicine.	Phonthee, S. and Amatachaya, P. and Sooknuan, T. and Amatachaya, S.	BACKGROUND: Lower limb support ability is important for steady and efficient mobility, but previous data commonly involved training during double stance positions, with or without external feedback, using a complex and costly machine. AIM: To compare the effects of stepping training with or without external feedback in relation to the lower limb support ability of the affected limb on the functio…	Biofeedback	lower limb	2020	Thailand	36	Improve functional ability	n/a	2	Stepping training with external feedback from a visiual weight taking machine	Stepping training without external feedback	999	999	0	0	0		0	0		0	0	0	0	1	0	0	0		0	0		0	0		0	0	1	0	1	1	1	1	0
2	15	rayyan-908237983	Effect and Safety of Transcutaneous Auricular Vagus Nerve Stimulation on Recovery of Upper Limb Motor Function in Subacute Ischemic Stroke Patients: A Randomized Pilot Study	Neural Plasticity	Wu, D. and Ma, J. and Zhang, L. and Wang, S. and Tan, B. and Jia, G.	Background: Transcutaneous auricular vagus nerve stimulation (taVNS) is regarded as a potential method for recovery in stroke. The effectiveness of taVNS in acute and subacute stroke should be further discussed as previously, only a few small-scale trials have focused on chronic stroke patients. The objective of this study is to investigate the effect and safety of taVNS on upper limb motor funct…	Vagus Nerve	upper limb	2020	China	21	To validate the efficacy and safety of taVNS in the recovery of upper limb motor function in subacute ischemia stroke patients		2	taVNS group	sham-taVNS group	999	999	0	0	0	0	0	0	0	0	0	0	0	1	0	0	0	0	0	0	0	0	0	0	0	0	0	0	1	1	0	1	0
3	17	rayyan-333121507	The Effect of Lower Extremity Strengthening Exercise Using Sliding Stander on Balance and Spasticity in Chronic Stroke: a Randomized Clinical Trial	J korean phys ther		PURPOSE: Generally, patients with stroke present with decreased balance and increased spasticity following weakness of the paralyzed muscles. Muscle weakness caused by stroke has two causes. This is caused by a decrease in motor output and an adaptive muscle change, resulting in muscle weakness and muscle paralysis. The purpose of this study was to investigate the effect of strengthening exercise…	Balance platform	lower limb	2019	Korea	20	to investigate the effect of strengthening exercise on balance and spasticity in chronic stroke patients and to suggest the basis for clinical treatment		2	Balance platform (MET300)	Standard therapy	999	999	1	0	0	0	0	0	0	0	0	0	0	1	0	0	0	0	0	0	0	0	0	0	0	0	0	0	1	1	0	1	0
4	46	rayyan-908232082	Effects of Transcranial Direct Current Stimulation (tDCS) Combined With Wrist Robot-Assisted Rehabilitation on Motor Recovery in Subacute Stroke Patients: A Randomized Controlled Trial	IEEE Transactions on Neural Systems & Rehabilitation Engineering	Mazzoleni, S. and Tran, V. D. and Dario, P. and Posteraro, F.	Both transcranial direct current stimulation (tDCS) and wrist robot-assisted training have demonstrated to be promising approaches for stroke rehabilitation. However, the effects of the combination of the two treatments in subacute stroke patients are not clear yet. To investigate the effectiveness of combining tDCS and wrist robot-assisted rehabilitation in subacute stroke patients in comparison…	brain stim	upper limb	2019	Italy	40	to investigate the effectiveness of combin_x0002_ing tDCS and wrist robot-assisted rehabilitation in subacute stroke patients	whether this combination therapy would provide additional benefits in comparison with robotic therapy only	2	tDCS +robot assisted training	Sham	999	999	1	0	0	0	0	0	0	0	0	0	0	1	0	0	0	0	0	0	0	0	0	0	0	0	0	0	1	1	1	1	0
5	76	rayyan-908237783	tDCS and Robotics on Upper Limb Stroke Rehabilitation: Effect Modification by Stroke Duration and Type of Stroke	BioMed Research International	Straudi, S. and Fregni, F. and Martinuzzi, C. and Pavarelli, C. and Salvioli, S. and Basaglia, N.	Objective . The aim of this exploratory pilot study is to test the effects of bilateral tDCS combined with upper extremity robot-assisted therapy (RAT) on stroke survivors. Methods. We enrolled 23 subjects who were allocated to 2 groups: RAT + real tDCS and RAT + sham-tDCS. Each patient underwent 10 sessions (5 sessions/week) over two weeks. Outcome measures were collected before and after treatm…	brain stim	upper limb	2016	Italy	23	to test the effects of a bilateral tDCS mon_x0002_tage combined with upper extremity robot-assisted training (RAT) compared to RAT alone on motor recovery, gross motor function, and arm functional use in a heterogeneous sample of stroke survivors	explored whether additional factors such as stroke duration and type could modify and also be predictors of tDCS and RAT response	2	tDCS+robot assisted training	Sham	999	999	1	0	0	0	0	0	0	0	0	0	0	1	0	0	0	0	0	0	0	0	0	0	1	0	1	0	1	1	1	1	0
6	84	rayyan-908237931	Effects of high-frequency repetitive transcranial magnetic stimulation over the contralesional motor cortex on motor recovery in severe hemiplegic stroke: A randomized clinical trial	Brain Stimulation	Wang, Q. and Zhang, D. and Zhao, Y. Y. and Hai, H. and Ma, Y. W.	BACKGROUND: The contralesional hemisphere compensation may play a critical role in the recovery of stroke when there is extensive damage to one hemisphere. There is little research on the treatment of hemiplegia by high-frequency repetitive transcranial magnetic stimulation (rTMS) delivered to the contralesional cortex. OBJECTIVE: We conducted a 2-week randomized, sham-controlled, single-blind tr…	brain stim	both	2020	China	71	the efficacy of 2 weeks of daily HF-rTMS on motor recovery		3	HF-rTMS	LF-rTMS	sham rTMS	999	1	0	0	0	0	0	0	0	0	0	0	1	0	0	0	0	0	0	0	0	0	0	0	0	1	0	1	1	1	1	0
7	88	rayyan-908237965	Establishing the optimum TDCS application on dual task gait performance-exploration of peoplewith chronic stroke	Neuromodulation	Wong, P. L. and Wang, R. Y. and Huang, S. F. and Tang, S. C. and Tsai, P. Y. and Yang, Y. R.	Introduction: Gait dysfunction influences activities of daily living in individuals with stroke. Although gait dysfunction can be improved by exercise, some dysfunction still exists especially challenged by a secondary task during walking (dual task gait) in stroke patients even at the chronic stage. Such dysfunction may be due to impaired modulation from central nervous system. Transcranial dire…	brain stim	lower limb	2021	Thailand	25	to determine the immediate and aftereffect of five sessions of dual-tDCS combined with task-specific training		2	tDCS	Sham	999	999	0	0	0	0	0	0	0	0	0	0	0	1	0	0	0	0	0	0	0	0	0	0	0	0	1	0	1	1	1	1	0
8	96	rayyan-333121593	Effects of different montages of transcranial direct current stimulation on the risk of falls and lower limb function after stroke	Neurological Research	Andrade, S. M. and Ferreira, J. J. A. and Rufino, T. S. and Medeiros, G. and Brito, J. D. and da Silva, M. A. and Moreira, R. N.	BACKGROUND: Stroke is associated with high rates of falling and severe impairment of lower limb in patients who survive. OBJECTIVE: The aim of this study was to analyze the effectiveness of different montages of transcranial direct current stimulation (tDCS) on reducing falls and on lower limb function after acute stroke. METHODS: Sixty participants with acute stroke were randomly allocated into …	brain stim	lower limb	2017	Brazil	60	the Four Square Step Test (FSSTtest) and the Overall StabilityIndex (OSI) of Biodex Balance System	The FallsEfficacy Scale – International (FES-I) BS [19] Six-minute walk test (6MWT) [20] and Sit to Stand Test(STS)	4	anodal tDCS	bilateral tDCS	cathodal tDCS	Sham	1	0	0	0	0	0	0	0	0	0	0	1	0	0	0	0	0	0	0	0	0	0	0	0	1	0	1	1	1	1	0
9	99	rayyan-333121598	Brain-computer interface-based robotic end effector system for wrist and hand rehabilitation: results of a three-armed randomized controlled trial for chronic stroke	Frontiers in Neuroengineering	Ang, K. K. and Guan, C. and Phua, K. S. and Wang, C. and Zhou, L. and Tang, K. Y. and Ephraim Joseph, G. J. and Kuah, C. W. and Chua, K. S.	The objective of this study was to investigate the efficacy of an Electroencephalography (EEG)-based Motor Imagery (MI) Brain-Computer Interface (BCI) coupled with a Haptic Knob (HK) robot for arm rehabilitation in stroke patients. In this three-arm, single-blind, randomized controlled trial; 21 chronic hemiplegic stroke patients (Fugl-Meyer Motor Assessment (FMMA) score 10-50), recruited after p…	Brain-Computer Interface	upper limb	2014	Singapore	21	FMMA score		3	BCI+ Haptic knob robot	Haptic knob robot	Standard therapy	999	1	0	0	0	0	0	0	0	0	0	0	1	0	0	0	0	0	0	0	0	0	0	0	0	1	0	1	1	1	1	0
10	101	rayyan-333121666	Effect of combination of transcranial direct current stimulation and feedback training on visuospatial neglect in patients with subacute stroke: a pilot randomized controlled trial	Journal of Physical Therapy Science	Bang, D. H. and Bong, S. Y.	[Purpose] To investigate the effects of a combination of transcranial direct current stimulation (tDCS) and feedback training (FT) on subacute stroke patients with unilateral visuospatial neglect. [Subjects] The subjects were randomly assigned to a tDCS + FT group (n=6) and a FT group (n=6). [Methods] Patients in the tDCS + FT group received tDCS for 20 minutes and then received FT for 30 minutes…	brain stim	upper limb	2015	Korea	12	the Motor-Free Visual Perception Test (MVPT) and the line bisection test (LBT)	Modified Barthel Index (MBI)	2	tDCS+FT	Feedback training (FT)	999	999	1	0	0	0	0	0	0	0	0	0	0	1	0	0	0	0	0	0	0	0	0	0	0	0	0	0	1	1	1	0	0
11	110	rayyan-333121820	Effects of repetitive transcranial magnetic stimulation on arm function and decreasing unilateral spatial neglect in subacute stroke: a randomized controlled trial	Clinical Rehabilitation	Cha, H. G. and Kim, M. K.	OBJECTIVE: The objective of this study is to investigate the effect of repetitive transcranial magnetic stimulation (rTMS) on the functional recovery of stroke patients with unilateral neglect. DESIGN: Randomized controlled experimental study. SETTING: Outpatient rehabilitation hospital. SUBJECTS: Thirty patients with stroke were randomly assigned to two groups: an rTMS group (experimental) and a…	Magnetic Stimulation	upper limb	2016	Korea	30	Line Bisection Test (LBT) Albert Test (AT) Grip Strength Test Box and Block Test (BBT)		2	rTMS	Sham	999	999	1	0	0	0	0	0	0	0	0	0	0	1	0	0	0	0	0	0	0	0	0	0	0	0	0	0	1	1	0	1	0
12	116	rayyan-333121893	Effect of mirror therapy with tDCS on functional recovery of the upper extremity of stroke patients	Journal of Physical Therapy Science	Cho, H. S. and Cha, H. G.	[Purpose] This study aimed to determine the effect of mirror therapy (MT) with transcranial direct current stimulation (tDCS) on the recovery of the upper extremity function of chronic stroke patients. [Subjects] Twenty-seven patients at least 6 months after stroke onset were divided randomly into an experimental group (14 patients) and a control group (13 patients). [Methods] All subjects receiv…	brain stim	upper limb	2015	Korea	27	Box and block test, Grip strength, Jebsen-Taylor, Fugl-Meyer assessment		2	MT+ tDCS	ony TDCS	999	999	0	0	0	0	0	0	0	0	0	0	0	1	0	0	0	0	0	0	0	0	0	0	0	0	0	0	1	1	0	1	0
13	126	rayyan-395831856	Effects of Transcranial Direct Current Stimulation With Sensory Modulation on Stroke Motor Rehabilitation: A Randomized Controlled Trial	Archives of Physical Medicine & Rehabilitation	Koh, C. L. and Lin, J. H. and Jeng, J. S. and Huang, S. L. and Hsieh, C. L.	OBJECTIVE: To test whether a multistrategy intervention enhanced recovery immediately and longitudinally in patients with severe to moderate upper extremity (UE) paresis. DESIGN: Double-blind, randomized controlled trial with placebo control. SETTING: Outpatient department of a local medical center. PARTICIPANTS: People (N=25) with chronic stroke were randomly assigned to 1 of 2 groups: a transcr…	brain stim	upper limb	2017	Taiwan	25	The FMA-UE	The Action Research Arm Test (ARAT) and The Barthel Index (BI)	2	tDCS-SM	Sham	999	999	0	0	0	0		0	0	0	0	0	0	1	0	0	0	0	0	0	0	0	0	0	0	0	1	0	1	1	1	1	0
14	129	rayyan-395831999	Single session of dual-tDCS transiently improves precision grip and dexterity of the paretic hand after stroke	Neurorehabilitation & Neural Repair	Lefebvre, S. and Thonnard, J. L. and Laloux, P. and Peeters, A. and Jamart, J. and V and ermeeren, Y.	BACKGROUND: After stroke, deregulated interhemispheric interactions influence residual paretic hand function. Anodal or cathodal transcranial direct current stimulation (tDCS) can rebalance these abnormal interhemispheric interactions and improve motor function. OBJECTIVE: We explored whether dual-hemisphere tDCS (dual-tDCS) in participants with chronic stroke can improve fine hand motor function…	brain stim	upper limb	2014	Belgium	19	the preloading phase duration (PLD) and grip force/load force ratio (GFL/LFL) for the precision grip—2	the Purdue Pegboard Test	2	dual-tDCS	Sham	999	999	0	0	0	0	0	0	0	0	0	0	0	1	0	0	0	0	0	0	0	0	0	0	0	0	1	0	1	1	1	1	0
15	139	rayyan-395827050	Gait training in subacute non-ambulatory stroke patients using a full weight-bearing gait-assistance robot: A prospective, randomized, open, blinded-endpoint trial	Journal of the Neurological Sciences	Ochi, M. and Wada, F. and Saeki, S. and Hachisuka, K.	BACKGROUND: This study was a prospective, randomized, open, blinded-endpoint trial with the aim of examining whether gait training with a gait-assistance robot (GAR) improves gait disturbances in subacute non-ambulatory hemiplegic stroke patients more than overground conventional gait training. The GAR adopts a robot arm control system with full weight bearing and foot pressure visual biofeedback…	Robotics	lower limb	2015	Japan	26	The FMA-UE, Muscle torque, Functional Ambulation Classification (FAC)		2	gait-assistant robot-assisted gait training	overground conventional gait training	999	999	0	0	0	0	0	0	0	0	0	0	0	1	0	0	0	0	0	0	0	0	0	0	0	0	1	0	1	1	1	1	0
16	147	rayyan-908237802	Efficacy of an insole shoe wedge and augmented pressure sensor for gait training in individuals with stroke: a randomized controlled trial	Clinical Rehabilitation	Sungkarat, S. and Fisher, B. E. and Kovindha, A.	OBJECTIVE: To determine whether external feedback to promote symmetrical weight distribution during standing and walking would improve gait performance and balance in people with stroke. DESIGN: Randomized, controlled, assessor-blinded trial. SETTING: Rehabilitation unit and physical therapy department. SUBJECTS: Thirty-five individuals with stroke (mean (SD) age = 53.0 (9.3) years) were randomly…	wearables	lower limb	2011	Thailand	35	Gait Speed (cm/s), Step length, Single support time, Berg Balance Ratio, timed up and go, loading on paratic leg during stance.		2	conventional stroke rehabilitation programme with the use of the I-ShoWS set-up during stance and gait training	conventional stroke rehabilitation programme	999	999	0	0	0	0	0	0	0	0	0	0	0	1	0	0	0	0	0	0	0	0	0	0	0	0	0	0	1	1	1	1	0
17	177	rayyan-908232087	Virtual reality exercise improves mobility after stroke: an inpatient randomized controlled trial	Stroke	McEwen, D. and Taillon-Hobson, A. and Bilodeau, M. and Sveistrup, H. and Finestone, H.	BACKGROUND AND PURPOSE: Exercise using virtual reality (VR) has improved balance in adults with traumatic brain injury and community-dwelling older adults. Rigorous randomized studies regarding its efficacy, safety, and applicability with individuals after stroke are lacking. The purpose of this study was to determine whether an adjunct VR therapy improves balance, mobility, and gait in stroke re…	VR	lower limb	2014	Canada	59	two minute walk tests (TMWT), Timed up and go (TUG)		2	VR games in standing	seated games no balance and weight shifting	999	999	0	0	0	0	0	0	0	0	0	0	0	1	0	0	0	0	0	0	0	0	0	0	0	0	1	0	1	0	1	1	0
18	184	rayyan-395827057	Efficacy of Virtual Reality Combined With Real Instrument Training for Patients With Stroke: A Randomized Controlled Trial	Archives of Physical Medicine & Rehabilitation	Oh, Y. B. and Kim, G. W. and Han, K. S. and Won, Y. H. and Park, S. H. and Seo, J. H. and Ko, M. H.	OBJECTIVE: To investigate the efficacy of real instrument training in virtual reality (VR) environment for improving upper-extremity and cognitive function after stroke. DESIGN: Single-blind, randomized trial. SETTING: Medical center. PARTICIPANTS: Enrolled subjects (N=31) were first-episode stroke, assessed for a period of 6 months after stroke onset; age between 20 and 85 years; patients with u…	VR	upper limb	2019	Korea	31	FMA-UE, Manual Muscle Test (MMT), hand grip test, Box and Block Test, 9-Hole Peg Test (9-HPT), modified Ashworth scale (MAS), K-MMSE, and the Korean-Montreal Cognitive Assessment (K-MoCA).		2	VR combined with real instrument training	Occupational therapy	999	999	1	0	0	0	0	0	0	0	0	0	0	1	0	0	0	0	0	1	0	0	0	0	0	0	1	0	1	1	1	1	0
19	207	rayyan-395827296	Efficacy of closed loop feedback system with augmented virtual reality visual cues training on gait and functional performance in stroke patients	Bioscience biotechnology research communications	Shaphe, A. and Shalla, I. H. and Al Baradie, R. S. and Qasheesh, M.	The traditional gait training techniques, which are not based on principles of motor control lack requisites in terms of training intensity, duration and enough practice to have any meaningful carryover effect. Therefore, the aim of this study is to investigate the efficacy closed loop visual cues incorporated augmented reality environment on functional gait and community ambulation in stroke pat…	VR	lower limb	2018	Saudi Arabia	28	GAITRite	Stroke Impact Scale	2	closed loop visual cues training through a head mounted device (HMD) with partial bodyweight supported treadmill training +a structured one-hour physical therapy session 6 day a week for four consecutive weeks	a structured one-hour physical therapy session 6 day a week for four consecutive weeks	999	999	0	0	0	0	0	0	0	0	0	0	0	0	0	0	0	0	0	0	0	0	0	0	0	0	0	0	1	1	1	1	0
20	224	rayyan-333121602	A Novel Virtual Reality Training Strategy for Poststroke Patients: A Randomized Clinical Trial	Journal of Healthcare Engineering	Anwar, N. and Karimi, H. and Ahmad, A. and Mumtaz, N. and Saqulain, G. and Gilani, S. A.	Stroke patients suffer impairments including sensory, motor, visual, and cognitive areas, as well as gait and balance manifestations making activities of daily living difficult. In such conditions, virtual reality training can be a potential rehabilitation tool in comparison to conventional physical therapy to cater to the burden of this disability; hence, this randomized clinical trial compared …	VR	lower limb	2021	Pakistan	68	/e Berg balance scale (BBS) and Fugl-Meyer assessmenttool for lower extremity (FMA-LE)		2	Virtual reality training group	Routine Physical therapy	999	999	0	0	0	0	0	0	0	0	0	1	0	1	0	0	0	0	0	0	0	0	0	0	0	0	1	0	1	1	1	1	0
21	226	rayyan-333121637	Exer-gaming reduces fall risk and improves mobility after stroke	JPMA - Journal of the Pakistan Medical Association	Aslam, M. and Ain, Q. U. and Fayyaz, P. and Malik, A. N.	The current study evaluated the effect of virtual reality based balance training in 30 stroke patients recruited via purposive sampling technique for a clinical trial. Sealed envelope method was used to randomly allocate patients into two groups, i.e. Exer-gaming group (EGG) (n=15) and traditional training (TBT) group (n=15). Patients ranging in age from 50 to 60 years were included using Modifie…	VR	lower limb	2021	Pakistan	30	Berg Balance Scale (BBS) andTimed Up & Go Test (TUG)		2	task specific balance training using virtual reality or exer-gaming via X-box 360 using a kinect	Task-oriented activities performed by the traditional group included side stepping, standing on wobble board, and sit to stand activity	999	999	0	0	0	0	0	0	0	0	0	1	0	1	0	0	0	0	0	0	0	0	0	0	0	0	1	0	0	1	1	1	0
22	283	rayyan-395831836	Virtual Reality for Upper Limb Rehabilitation in Subacute and Chronic Stroke: A Randomized Controlled Trial	Archives of Physical Medicine & Rehabilitation	Kiper, P. and Szczudlik, A. and Agostini, M. and Opara, J. and Nowobilski, R. and Ventura, L. and Tonin, P. and Turolla, A.	OBJECTIVE: To evaluate the effectiveness of reinforced feedback in virtual environment (RFVE) treatment combined with conventional rehabilitation (CR) in comparison with CR alone, and to study whether changes are related to stroke etiology (ie, ischemic, hemorrhagic). DESIGN: Randomized controlled trial. SETTING: Hospital facility for intensive rehabilitation. PARTICIPANTS: Patients (N=136) withi…	VR	upper limb	2018	Italy	136	the Fugl-Meyer upper extremity scale (F-M UE)	the FIM29; the NIHSS23; and the Edmonton Symptom Assessment Scale (ESAS)	2	Reinforced feedback virtual environment	conventional stroke rehabilitation programme	999	999	0	0	0	0	0	0	0	0	0	0	0	1	0	0	0	0	0	0	0	0	0	0	0	0	0	0	1	1	0	1	0
23	294	rayyan-395831954	Effects of virtual reality-based training and task-oriented training on balance performance in stroke patients	Journal of Physical Therapy Science	Lee, H. Y. and Kim, Y. L. and Lee, S. M.	[Purpose] This study aimed to investigate the clinical effects of virtual reality-based training and task-oriented training on balance performance in stroke patients. [Subjects and Methods] The subjects were randomly allocated to 2 groups: virtual reality-based training group (n = 12) and task-oriented training group (n = 12). The patients in the virtual reality-based training group used the Nint…	VR	lower limb	2015	Korea	24	Balance and functional reach test		2	Nintendo Wii Fit plus +conventional physical therapy	Task oriented training + conventional physical therapy	999	999	1	0	0	0	0	0	0	0	0	0	0	1	0	0	0	0	0	0	0	0	0	0	0	0	0	0	1	1	0	0	0
24	297	rayyan-395831973	Canoe game-based virtual reality training to improve trunk postural stability, balance, and upper limb motor function in subacute stroke patients: a randomized controlled pilot study	Journal of Physical Therapy Science	Lee, M. M. and Shin, D. C. and Song, C. H.	[Purpose] This study was aimed at investigating the preliminary therapeutic efficacy and usefulness of canoe game-based virtual reality training for stroke patients. [Subjects and Methods] Ten stroke patients were randomly assigned to an experimental group (EG; n=5) or a control group (CG; n=5). Patients in both groups participated in a conventional rehabilitation program, but those in the EG add…	VR	lower limb	2016	South Korea	10	the Trunk Impairment Scale (TIS) and functional reach test (FRT) the Berg Balance Scale (BBS) and timed up-and-go (TUG) tests were used. The Fugl-Meyer assessment (FMA)		2	Conventional rehabilitation + Virtual Reality training programme	conventional stroke rehabilitation programme	999	999	1	0	0	0	0	0	0	0	0	0	0	0	1	0	0	0	0	0	0	0	0	0	0	0	0	0	1	1	1	1	0
25	300	rayyan-395831985	Virtual Reality Rehabilitation With Functional Electrical Stimulation Improves Upper Extremity Function in Patients With Chronic Stroke: A Pilot Randomized Controlled Study	Archives of Physical Medicine & Rehabilitation	Lee, S. H. and Lee, J. Y. and Kim, M. Y. and Jeon, Y. J. and Kim, S. and Shin, J. H.	OBJECTIVE: To compare virtual reality (VR) combined with functional electrical stimulation (FES) with cyclic FES for improving upper extremity function and health-related quality of life in patients with chronic stroke. DESIGN: A pilot, randomized, single-blind, controlled trial. SETTING: Stroke rehabilitation inpatient unit. PARTICIPANTS: Participants (N=48) with hemiplegia secondary to a unilat…	VR	upper limb	2018	Korea	48	n Fugl-Meyer AssessmenteUpper Extremity and Wolf Motor Function Test	Box and Block Test, Jebsen-Taylor Hand Function Test, and Stroke Impact Scale s	2	VR + FES	FES only	999	999	0	0	0	0	0	0	0	0	0	0	0	1	0	0	0	0	0	0	0	0	0	0	0	0	0	1	1	1	1	1	0
26	306	rayyan-395831639	Effects of Brain-Computer Interface-controlled Functional Electrical Stimulation Training on Shoulder Subluxation for Patients with Stroke: A Randomized Controlled Trial	Occupational Therapy International	Jang, Y. Y. and Kim, T. H. and Lee, B. H.	The purpose of this study was to investigate the effects of brain-computer interface (BCI)-controlled functional electrical stimulation (FES) training on shoulder subluxation of patients with stroke. Twenty subjects were randomly divided into two groups: the BCI-FES group (n = 10) and the FES group (n = 10). Patients in the BCI-FES group were administered conventional therapy with the BCI-FES on …	Brain-Computer Interface	upper limb	2016	Korea	20	Shoulder subluxation	MAS (spasticity), 10cm VAS (pain intensity), MFT (upperlimb function test)	2	BCI+ FES +Conventinal therapy	FES + Conventional Therapy	999	999	1	0	0	0	0	0	0	0	0	0	0	1	0	0	0	0	0	0	0	0	0	0	0	0	0	0	1	1	0	1	0
27	332	rayyan-908238024	Effects of repetitive transcranial magnetic stimulation combined with sensory cueing on unilateral neglect in subacute patients with right hemispheric stroke: a randomized controlled study	Clinical Rehabilitation	Yang, N. Y. and Fong, K. N. and Li-Tsang, C. W. and Zhou, D.	OBJECTIVE: To compare the effects of rTMS combined with sensory cueing, rTMS alone, and conventional rehabilitation on unilateral neglect, hemiplegic arm functions and performance of activities of daily living. DESIGN: A single-blinded randomized controlled trial. SETTING: A convalescent hospital. SUBJECTS: Sixty inpatients with left unilateral neglect after stroke. INTERVENTIONS: Patients were r…	Magnetic Stimulation	upper limb	2017	China	60	Behavioural Inattention test and The Catherine Bergago Scale	the Fugl-Meyer Assessment, The Action Research Arm Test, The Modified Barthel Index	3	rTMS + sensory cueing	rTMS	Conventional rehabilitation only	999	1	0	0	0	0	0	0	0	0	0	0	1	0	0	0	0	0	0	0	0	0	0	0	0	0	0	1	1	1	1	0
28	340	rayyan-333121694	Noninvasive neurostimulation in chronic stroke: a double-blind randomized sham-controlled testing of clinical and corticomotor effects	Topics in Stroke Rehabilitation	Beaulieu, L. D. and Masse-Alarie, H. and Brouwer, B. and Schneider, C.	BACKGROUND: Repetitive peripheral magnetic stimulation (RPMS) is a painless and noninvasive method to produce afferents via the depolarization of the peripheral nervous system. A few studies tested RPMS after-effects on cerebral plasticity and motor recovery in stroke individuals, but evidences remain limited. OBJECTIVES: This study aimed to explore whether RPMS could mediate improvements in cort…	Magnetic Stimulation	lower limb	2015	Canada	32	TMS testing, Range of motion, isometric muscle strength, resistance of plantar flexors to stretch	n/a	3	RPMS	Sham	Healthy control	999	0	0	0	0	0	0	0	0	0	0	0	1	0	0	0	0	0	0	0	0	0	0	0	0	0	0	1	1	1	1	0
29	342	rayyan-395831557	Intermittent theta burst stimulation over ipsilesional primary motor cortex of subacute ischemic stroke patients: a pilot study	Brain Stimulation	Hsu, Y. F. and Huang, Y. Z. and Lin, Y. Y. and Tang, C. W. and Liao, K. K. and Lee, P. L. and Tsai, Y. A. and Cheng, H. L. and Cheng, H. and Chern, C. M. and Lee, I. H.	BACKGROUND: We demonstrated that prolonged transcranial magnetic intermittent theta burst stimulation (iTBS, 1200 pulses/session=iTBS1200) produces longer-lasting facilitation in corticospinal excitability than ordinary form of iTBS in healthy subjects. OBJECTIVE: Here we show the safety and small-scale efficacy of iTBS1200 over ipsilesional primary motor cortex (M1) in subacute stroke patients. …	Magnetic Stimulation	upper limb	2013	Taiwan	12	National Institute of Health Stroke Scale (NIHSS), the modified Rankin Scale (mRS), the Upper Extremity Fugl-Meyer Test (UE-FMT), the Action Research Arm Test (ARAT), active motor thresholds (aMT) and MEPs from bilateral extensor carpi radialis (ECR), and finger lifting-related MEG at baseline		2	iTBS	Sham	999	999	1	0	0	0	0	0	0	0	0	0	0	1	0	0	0	0	0	0	0	0	0	0	0	0	0	1	1	1	1	1	0
30	372	rayyan-395831753	Effect of Task Specific Exercises, Gait Training, and Visual Biofeedback on Equinovarus Gait among Individuals with Stroke: Randomized Controlled Study	Neurology Research International	Khallaf, M. E. and Gabr, A. M. and Fayed, E. E.	Background and Purpose . Equinovarus foot is a common sign after stroke. The aim of this study is to investigate the effect of task specific exercises, gait training, and visual biofeedback on correcting equinovarus gait among individuals with stroke. Subjects and Methods. Sixteen subjects with ischemic stroke were randomly assigned to two equal groups (G1 and G2). All the patients were at stage …	Biofeedback	lower limb	2014	Egypt	16	Foot placement	n/a	2	Task specific training + biofeedback	conventional stroke rehabilitation programme	999	999	1	0	0	0	0	0	0	0	0	0	0	1	0	0	0	0	0	0	0	0	0	0	0	0	0	0	1	1	1	1	0
31	376	rayyan-592708126	Efficacy of an Electromechanical Gait Trainer Poststroke in Singapore: A Randomized Controlled Trial	Archives of Physical Medicine & Rehabilitation	Chua, J. and Culpan, J. and Menon, E.	OBJECTIVE: To evaluate the longer-term effects of electromechanical gait trainers (GTs) combined with conventional physiotherapy on health status, function, and ambulation in people with subacute stroke in comparison with conventional physiotherapy given alone. DESIGN: Randomized controlled trial with intention-to-treat analysis. SETTING: Community hospital in Singapore. PARTICIPANTS: Nonambulant…	Robotics	lower limb	2016	Singapore	106	the Functional Ambulation Category (FAC)		2	Electromechanical gait trainer	conventional stroke rehabilitation programme	999	999	1	0	0	0	0	1	0	0	0	0	0	1	0	0	0	0	0	0	0	0	0	0	0	0	1	0	1	1	1	1	0
32	382	rayyan-908232080	Early robot-assisted gait retraining in non-ambulatory patients with stroke: a single blind randomized controlled trial	European journal of physical & rehabilitation medicine.	Mayr, A. and Quirbach, E. and Picelli, A. and Kofler, M. and Smania, N. and Saltuari, L.	BACKGROUND: Restoration of walking function is a primary concern of neurorehabilitation with respect to the aspired social and vocational reintegration. To date, the best practice for improving gait early after stroke is still object of debate. On one hand, repetitive task-specific approaches with higher intensities of walking have been observed to result in greater improvements of gait after str…	Robotics	lower limb	2018	Italy	66	the modified Emory Functional Ambulation Profile (mEFAP)	The Rivermead Motor Index (RMI), The Mobility Milestones (MM),The Hochzirl Walking Aids Profile (H-WAP)	2	robot-assisted gait training (RAGT)	conventional overground gait training	999	999	0	0	0	0	0	0	0	0	0	0	0	1	0	0	0	0	0	0	0	0	0	0	0	0	0	0	1	1	1	1	0
33	388	rayyan-908237746	Evidence of neuroplasticity with robotic hand exoskeleton for post-stroke rehabilitation: a randomized controlled trial	Journal of Neuroengineering & Rehabilitation	Singh, N. and Saini, M. and Kumar, N. and Srivastava, M. V. P. and Mehndiratta, A.	BACKGROUND: A novel electromechanical robotic-exoskeleton was designed in-house for the rehabilitation of wrist joint and Metacarpophalangeal (MCP) joint. OBJECTIVE: The objective was to compare the rehabilitation effectiveness (clinical-scales and neurophysiological-measures) of robotic-therapy training sessions with dose-matched conventional therapy in patients with stroke. METHODS: A pilot pro…	Robotics	upper limb	2021	India	27	the level of spasticity at wrist joint measured by Modifed Ashworth Scale (MAS 0–4), range of voluntary wrist movement defned in terms of Active Range of motion of wrist (AROM 00 –700 ) as measured by a goniometer, stage of stroke recovery measured by Brunnstrom Stages (1–7), Barthel Index (0–100) and functional and sensorimotor-control of upper-limb as measured by Fugl-Meyer Scale Upper Limb (FM…		2	Robotic therapy	conventional stroke rehabilitation programme	999	999	0	0	0	0	0	0	0	0	0	0	0	1	0	0	0	0	0	0	0	0	0	0	0	0	1	0	1	1	0	1	0
34	418	rayyan-908238008	Robotic tilt table exercises versus conventional exercises in rehabilitation of hemiplegic patients	International Journal of Therapy & Rehabilitation	Yadav, Ramakant and Kuma, Suraj and Aafreen and Yadav, S and eep	Background/Aims: Early mobilisation in people with stroke has the potential to affect a number of health-related areas, such as power, coordination, reflex activity, joint range of motion and wellbeing. The aim of this study was to determine the efficacy of a 1-month exercise programme using a robotic tilt table over conventional physiotherapy treatment in the rehabilitation of patients with hemi…	Robotics	lower limb	2018	India	30	QoL (SF-36), muscle strength (he Medical Research Council Muscle Scale )		2	Robotic tilt table	conventional stroke rehabilitation programme	999	999	0	0	0	0	0	0	0	0	0	1	0	1	0	0	0	0	0	0	0	0	0	0	0	0	1	0	1	1	1	0	0
35	439	rayyan-333121605	Upper Limb Robotic Rehabilitation After Stroke: A Multicenter, Randomized Clinical Trial	Journal of Neurologic Physical Therapy	Aprile, I. and Germanotta, M. and Cruciani, A. and Loreti, S. and Pecchioli, C. and Cecchi, F. and Montesano, A. and Galeri, S. and Diverio, M. and Falsini, C. and Speranza, G. and Langone, E. and Papadopoulou, D. and Padua, L. and Carrozza, M. C. and Group, F. D. G. Robotic Rehabilitation	BACKGROUND AND PURPOSE: After stroke, only 12% of survivors obtain complete upper limb (UL) functional recovery, while in 30% to 60% UL deficits persist. Despite the complexity of the UL, prior robot-mediated therapy research has used only one robot in comparisons to conventional therapy. We evaluated the efficacy of robotic UL treatment using a set of 4 devices, compared with conventional therap…	Robotics	upper limb	2020	Italy	247	Fugl-mayer Assessent of Sensory Motor recovery after stroke	Motricity Index (MI)36; Medical Research Council (MRC)37; Modified Ashworth Scale (MAS)38; Neuropathic Pain Diagnostic Ques_x0002_tionnaire (DN4)39; Numerical Rating Scale of pain (NRS)40; modified Barthel Index (mBI)41; Frenchay Arm Test (FAT)42; Action Research Arm Test (ARAT)43; and 36-item Short Form Health Survey (SF36)	2	robotic	conventional stroke rehabilitation programme	999	999	0	0	0	0	0	0	0	0	0	0	0	1	0	0	0	0	0	0	0	0	0	0	0	0	1	0	1	1	1	1	0
36	448	rayyan-333121774	Technology-assisted stroke rehabilitation in Mexico: a pilot randomized trial comparing traditional therapy to circuit training in a Robot/technology-assisted therapy gym	Journal of Neuroengineering & Rehabilitation	Bustamante Valles, K. and Montes, S. and Madrigal Mde, J. and Burciaga, A. and Martinez, M. E. and Johnson, M. J.	BACKGROUND: Stroke rehabilitation in low- and middle-income countries, such as Mexico, is often hampered by lack of clinical resources and funding. To provide a cost-effective solution for comprehensive post-stroke rehabilitation that can alleviate the need for one-on-one physical or occupational therapy, in lower and upper extremities, we proposed and implemented a technology-assisted rehabilita…	Robotics	both	2016	Mexico	20	. The Fugl-Meyer Upper Extremity Test (UE-FM) [59–61], the Rancho Los Amigos Functional Test for the upper extremity (UE-FT) [62], and the Box and Block Test (BBT) The Fugl-Meyer Lower Extremity Test (LE-FM) [64–66], the 6-minute Walk Test (6MinWT) [67, 68], the 10-meter Walk Test (10MtsWT) [66], and the Timed Up and Go Test (TUG)		2	robotic gym	conventional stroke rehabilitation programme	999	999	0	0	0	0	0	0	0	0	0	0	0	1	0	0	0	0	0	0	0	0	0	0	0	0	1	0	1	1	1	0	0
37	456	rayyan-333121881	Brain-Computer Interface-Based Soft Robotic Glove Rehabilitation for Stroke	IEEE Transactions on Biomedical Engineering	Cheng, N. and Phua, K. S. and Lai, H. S. and Tam, P. K. and Tang, K. Y. and Cheng, K. K. and Yeow, R. C. and Ang, K. K. and Guan, C. and Lim, J. H.	OBJECTIVE: This randomized controlled feasibility study investigates the ability for clinical application of the Brain-Computer Interface-based Soft Robotic Glove (BCI-SRG) incorporating activities of daily living (ADL)-oriented tasks for stroke rehabilitation. METHODS: Eleven recruited chronic stroke patients were randomized into BCI-SRG or Soft Robotic Glove (SRG) group. Each group underwent 12…	Robotics	upper limb	2020	Singapore	11	Fugl-mayer Assessent for upper extremity, The Action Research Arm Test		2	BCI-assisted Soft Robotic Glove (BCI-SRG	the Soft Robotic Glove (SRG) group	999	999	0	0	0	0	0	0	0	0	0	0	0	1	0	0	0	0	0	0	0	0	0	0	0	0	1	0	1	1	1	1	0
38	474	rayyan-333121857	Effects of Home-based Telesupervising Rehabilitation on Physical Function for Stroke Survivors with Hemiplegia: A Randomized Controlled Trial	American Journal of Physical Medicine & Rehabilitation	Chen, J. and Jin, W. and Dong, W. S. and Jin, Y. and Qiao, F. L. and Zhou, Y. F. and Ren, C. C.	OBJECTIVE: The aims of this work were to evaluate the effects of home-based telesupervising rehabilitation on physical function for stroke survivors with hemiplegia and to determine if the rehabilitation therapy can relieve the burden on caregivers. DESIGN: This study is a randomized, controlled, assessor-blinded trial. Stroke survivors were randomly assigned to either home-based telesupervising …	Telehealth	both	2016	China	54	Modified Barthel Index (MBI)	The Berg Balance Scale (BBS), The Caregiver Strain Index (CSI)	2	Tele-supervision rehabilitation	Conventional rehabilitation	999	999	1	0	0	0	0	0	0	0	0	1	0	1	0	0	0	0	0	1	0	0	0	0	0	1	1	0	1	1	1	1	0
39	476	rayyan-333121869	Feasibility and effect of interactive telerehabilitation on balance in individuals with chronic stroke: a pilot study	Journal of Neuroengineering & Rehabilitation	Chen, S. C. and Lin, C. H. and Su, S. W. and Chang, Y. T. and Lai, C. H.	BACKGROUND: Stroke survivors need continuing exercise intervention to maintain functional status. This study assessed the feasibility and efficacy of an interactive telerehabilitation exergaming system to improve balance in individuals with chronic stroke, compared to conventional one-on-one rehabilitation. METHODS: In this prospective case-control pilot study, 30 Taiwanese individuals with chron…	VR	lower limb	2021	Taiwan	30	Berg Balance Scale (BBS)	Timed Up & Go Test (TUG), Motricity Index, Functional ambulation category, modified falls efficacy scale	2	VR	conventional stroke rehabilitation programme	999	999	1	0	0	0	0	0	0	0	0	0	0	1	0	0	0	0	0	0	0	0	0	0	0	0	0	0	1	1	1	1	0
40	486	rayyan-592708067	Does altering inclination alter effectiveness of treadmill training for gait impairment after stroke? A randomized controlled trial	Clinical Rehabilitation	Carda, S. and Invernizzi, M. and Baricich, A. and Cognolato, G. and Cisari, C.	OBJECTIVE: To assess whether a downhill walking training programme is more effective than the same amount of training applied uphill in chronic stroke survivors. DESIGN: Randomized, single-blind study. SETTING: Outpatient rehabilitation service. METHODS: Thirty-eight adults with hemiplegia from stroke lasting more than three months were randomly allocated to one of the two groups: 'UP' - 45 minut…	Treadmill	lower limb	2013	Italy	38	6-minute walking test (6MWT)	10mWT, timed up and go (TUG)	2	45 minutes of physical therapy + 30 minutes of treadmill with 5% ascending slope	45 minutes of physical therapy + 30 minutes of treadmill with 5% descending slope	999	999	1	0	0	0	0	0	0	0	0	0	0	0	0	0	0	0	0	0	0	0	0	0	0	0	1	0	1	1	1	0	0
41	520	rayyan-908232118	The effects of electromyography-triggered neuromuscular electrical stimulation plus tilt sensor functional electrical stimulation training on gait performance in patients with subacute stroke: a randomized controlled pilot trial	International Journal of Rehabilitation Research	Mitsutake, T. and Sakamoto, M. and Horikawa, E.	The effects of electromyography-triggered neuromuscular electrical stimulation and tilt sensor functional electrical stimulation on ankle dorsiflexion during walking are unclear. This study investigated whether combined electrical stimulation training affects gait performance in patients with stroke. Thirty-six patients were randomly assigned to a control (n = 13), electromyography-triggered neur…	Electrical Stimulation	lower limb	2019	Japan	36	10-meter walking tests (10MWTs).		3	EMG triggered NMES training + tilt sensor FES training	EMG triggered NMES training	Conventional rehabilitation only	999	0	0	0	0	0	0	0	0	0	0	0	1	0	0	0	0	0	0	0	0	0	0	0	0	0	0	1	1	1	1	0
42	524	rayyan-908237756	Assisted leg displacements and progressive loading by a tilt table combined with FES promote gait recovery in acute stroke	Neurorehabilitation	Solopova, I. A. and Tihonova, D. Y. and Grishin, A. A. and Ivanenko, Y. P.	OBJECTIVE: Here we developed and tested a novel system for early motor rehabilitation in acute stroke when patients are unable to stand and walk without assistance. Stepping performance may be largely facilitated by providing treatment in the supine position on a tilt table using step-synchronized functional electrical stimulation (FES) with assisted leg movements and progressive limb loading. ME…	Electrical Stimulation	lower limb	2011	russia	61	Fugl-Meyer scale [18]. theNational Institutes of Health Stroke Scale (NIHSS) [19]and European Stroke Scale (ESS) [20]. The BarthelIndex (BI)		2	FES-therapy combined with as-sisted leg movements and progressive limb loading	conventional stroke rehabilitation programme	999	999	0	0	0	0	0	0	0	0	0	0	0	1	0	0	0	0	0	0	0	0	0	0	0	0	0	0	0	1	1	1	0
43	529	rayyan-908237841	Myoelectrically driven functional electrical stimulation may increase motor recovery of upper limb in poststroke subjects: a randomized controlled pilot study	Journal of Rehabilitation Research & Development	Thorsen, R. and Cortesi, M. and Jonsdottir, J. and Carpinella, I. and Morelli, D. and Casiraghi, A. and Puglia, M. and Diverio, M. and Ferrarin, M.	The objective of this randomized controlled pilot study was to assess the feasibility and effectiveness of myoelectrically controlled functional electrical stimulation (MeCFES) for rehabilitation of the upper limb in poststroke subjects. Eleven poststroke hemiparetic subjects with residual proximal control of the arm, but impaired volitional opening of the paretic hand, were enrolled and randomiz…	Electrical Stimulation	upper limb	2013	Italy	11	The Action Research Arm Test	Individually prioritized Problem Asessement (IPPA)	2	MeCFES	conventional stroke rehabilitation programme	999	999	0	0	0	0	0	0	0	0	0	0	0	0	0	0	0	0	0	0	0	0	0	0	0	0	1	0	1	1	1	0	0
44	530	rayyan-908237845	The Effect of Upper Extremity Electrical Stimulation in Addition to Conventional Rehabilitation in Individuals with Chronic Stroke: Randomized Controlled Study	Journal of Physical Medicine & Rehabilitation Sciences / Fiziksel Tup ve Rehabilitasyon Bilimleri Dergisi	TÄ°LkÄ°CÄ°, Mehmet and AlemdaroÄžLu, Ebru and M and iroÄžLu, Sibel and Ordu GÃ–Kkaya, NilÃ¼fer Kutay and UÃ‡An, Halil and Aykan, Sanem AslÄ±han	Objective: To investigate the effect of electrical stimulation of wrist and finger extensor muscles applied in addition to the conventional rehabilitation program on wrist spasticity, hand motor function, and quality of life in individuals with chronic stroke. Material and Methods: Patients were randomized into two groups as control (n=20) and treatment groups (n=20). Patients in the treatment gr…	Electrical Stimulation	upper limb	2017	Turkey	40	Brunnstrom's Motor stage recovery, Fugl Meyer Assessment Scale, Modified Ashworth Scale	The Du-ruöz Hand Index, Functional Independence Measure (FIM), and Nottinhgam Health Profile (NHP)	2	Surface neuromuscular electrical stimulation	Conventional rehabilitation	999	999	1	0	0	0	0	0	0	0	0	1	0	1	0	0	0	0	0	0	0	0	0	0	0	0	0	0	1	1	1	1	0
45	539	rayyan-908238032	Effects of neuromuscular electrical stimulation on gait performance in chronic stroke with inadequate ankle control - A randomized controlled trial	PLoS ONE [Electronic Resource]	Yang, Y. R. and Mi, P. L. and Huang, S. F. and Chiu, S. L. and Liu, Y. C. and Wang, R. Y.	Neuromuscular electrical stimulation (NMES) has been used to improve muscle strength and decrease spasticity of the ankle joint in stroke patients. However, it is unclear how NMES could influence dynamic spasticity of ankle plantarflexors and gait asymmetry during walking. The study aimed to evaluate the effects of applying NMES over ankle dorsiflexors or plantarflexors on ankle control during wa…	Electrical Stimulation	lower limb	2018	Taiwan	25	the GAITRite system	Static and dynamic spasticity of ankle plantarflexors during gait., Maximum position of the ankle joint during gait.Muscle strength.	3	(NMES applied on tibialis anterior muscle	NMES applied on medial gastrocnemius muscle)	20 minutes of range of motion and stretching exercises, followed by 15 minutes of ambulation training	999	1	0	0	0	0	0	0	0	0	0	0	1	0	0	0	0	0	0	0	0	0	0	0	0	0	0	1	1	1	1	0
46	542	rayyan-908238094	Efficiency of Neuromuscular Electrical Stimulation and Transcutaneous Nerve Stimulation on Hemiplegic Shoulder Pain: A Randomized Controlled Trial	Archives of Physical Medicine & Rehabilitation	Zhou, M. and Li, F. and Lu, W. and Wu, J. and Pei, S.	OBJECTIVE: To compare the efficacy of neuromuscular electrical stimulation (NMES) and transcutaneous nerve stimulation (TENS) on hemiplegic shoulder pain (HSP). DESIGN: This is a prospective randomized controlled trial. SETTING: A rehabilitation hospital. PARTICIPANTS: Participants (N=90) were randomized into NMES (n=36), TENS (n=36), or control groups (n=18). INTERVENTIONS: NMES (15Hz, pulse wid…	Electrical Stimulation	upper limb	2018	China	90	Numerical rating scale (NRS),	active/passive range of motion (AROM/PROM) of shoulder, upper extremity Fugl-Meyer Assessment (FMA), modified Ashworth scale (MAS), Barthel Index (BI), and stroke-specific quality of life scale (SSQOLS)	3	NMES	TENS	Conventional rehabilitation only	999	0	0	0	0	0	0	0	0	0	0	0	1	0	0	0	0	0	0	0	0	0	0	0	0	0	1	0	1	1	1	0
47	547	rayyan-592708130	Therapeutic effect of functional electrical stimulation-triggered gait training corresponding gait cycle for stroke	Gait & Posture	Chung, Yijung and Kim, Jung-Hyun and Cha, Yuri and Hwang, Sujin	The purpose of this study was to determine the therapeutic effects of functional electrical stimulation (FES) applied to the gluteus medius and tibialis anterior muscles during the gait cycle in individuals with hemiparetic stroke. Eighteen patients who had suffered a stroke were enrolled in this study. The participants were divided into either the gluteus medius and tibialis anterior (GM + TA) t…	Neuromuscular stimulation	lower limb	2014	Korea	18	GAITRite	Berg Balance Scale (BBS)	2	FES-triggered gait training to the gluteus medius (GM) in the stance phase and the tibialis anterior (TA)	Conventional stroke rehabilitation programme	999	999	0	0	0	0	0	0	0	0	0	0	0	1	0	0	0	0	0	0	0	0	0	0	0	0	0	0	1	1	0	1	0
48	562	rayyan-908237743	Additional virtual reality training using Xbox Kinect in stroke survivors with hemiplegia	American Journal of Physical Medicine & Rehabilitation	Sin, H. and Lee, G.	OBJECTIVE: The aim of this study was to investigate the effects of additional virtual reality training using Xbox Kinect on upper extremity function, including range of motion, motor function, and gross manual dexterity, in stroke survivors with hemiplegia. DESIGN: This study is a randomized controlled trial. Forty participants were randomly allocated to either the experimental or control groups;…	VR	upper limb	2013	Korea	40	the Fugl-Meyer upper extremity scale (F-M UE)	AROM	2	VR training using Xbax Kinect	Conventional occupational therapy	999	999	0	0	0	0	0	0	0	0	0	0	0	1	0	0	0	0	0	0	0	0	0	0	0	0	0	0	1	1	1	1	0
49	564	rayyan-908237761	Effect of virtual reality games on stroke patients' balance, gait, depression, and interpersonal relationships	Journal of Physical Therapy Science	Song, G. B. and Park, E. C.	[Purpose] The purpose of the study was to determine the effects of training using virtual reality games on balance and gait ability, as well as the psychological characteristics of stroke patients, such as depression and interpersonal relationships, by comparing them with the effects of ergometer training. [Subjects] Forty stroke patients were randomly divided into a virtual reality group (VRG, N…	VR	lower limb	2015	Korea	40	the timed up and go (TUG) test and the 10-m walking test	Beck Depression Inventory [BDI] and the relationship change scale (RCS).	2	Virtual reality training group	Ergometer training group	999	999	0	0	0	0	0	0	0	0	0	0	0	1	0	0	0	0	0	0	0	0	0	0	0	0	0	0	1	1	0	1	0
50	574	rayyan-908238031	Effects of interactive visual feedback training on post-stroke pusher syndrome: a pilot randomized controlled study	Clinical Rehabilitation	Yang, Y. R. and Chen, Y. H. and Chang, H. C. and Chan, R. C. and Wei, S. H. and Wang, R. Y.	OBJECTIVE: We investigated the effects of a computer-generated interactive visual feedback training program on the recovery from pusher syndrome in stroke patients. DESIGN: Assessor-blinded, pilot randomized controlled study. PARTICIPANTS: A total of 12 stroke patients with pusher syndrome were randomly assigned to either the experimental group (N = 7, computer-generated interactive visual feedba…	VR	lower limb	2015	Taiwan	12	The scale for contraversive pushing for severity of pusher syndrome, the Berg Balance Scale for balance performance, and the Fugl-Meyer assessment scale for motor control		2	computer-generated interactive visual feedback training	mirror visual feedback training	999	999	1	0	0	0	0	0	0	0	0	0	0	1	0	0	0	0	0	0	0	0	0	0	0	0	0	0	1	1	1	0	0
51	591	rayyan-908231993	Effects of repetitive transcranial magnetic stimulation of the unaffected hemisphere leg motor area in patients with subacute stroke and substantial leg impairment: A pilot study	Journal of Rehabilitation Medicine	Lin, Y. N. and Hu, C. J. and Chi, J. Y. and Lin, L. F. and Yen, T. H. and Lin, Y. K. and Liou, T. H.	OBJECTIVE: To evaluate the effects of repetitive transcranial magnetic stimulation (rTMS) on mobility among patients with substantial leg impairment after subacute stroke. DESIGN: Double-blinded, stratified, randomized trial involving a sham control group. PARTICIPANTS: Patients who developed unilateral hemiplegia after first-ever subacute stroke and underwent inpatient stroke rehabilitation. MET…	Electrical Stimulation	lower limb	2015	Taiwan	32	Postural Assessment Scale (PASS)	the Tinetti Performance-Oriented Mobility Assessment (POMA-b, 0–16 points), TUG, Barthel Index lower extremity	2	rTMS	Sham rTMS	999	999	1	0	0	0	0	0	0	0	0	0	0	1	0	0	0	0	0	1	0	0	0	0	0	0	1	0	1	1	1	1	0
52	593	rayyan-908232032	The Effectiveness of 1 Hz rTMS Over the Primary Motor Area of the Unaffected Hemisphere to Improve Hand Function After Stroke Depends on Hemispheric Dominance	Brain Stimulation	Ludemann-Podubecka, J. and Bosl, K. and Theilig, S. and Wiederer, R. and Nowak, D. A.	OBJECTIVE: Inhibition of motor cortex excitability of the contralesional hemisphere may improve dexterity of the affected hand after stroke. METHODS: 40 patients (17 dominant hemispheric stroke, 23 non-dominant hemispheric stroke) with a mild to moderate upper limb motor impairment were enrolled in a double-blind, randomized, placebo-controlled trial with two parallel-groups. Both groups received…	Electrical Stimulation	upper limb	2015	Germany	40	The Wolf Motor function test and Motor evaluation scale for upper extremity, finger tapping, hand tapping		2	rTMS	Sham rTMS	999	999	0	0	0	0	0	0	0	0	0	0	0	1	0	0	0	0	0	0	0	0	0	0	0	0	0	0	1	1	0	1	0
53	602	rayyan-395827119	Effects of mental practice combined with electromyogram-triggered electrical stimulation for upper extremity function in stroke patients	Journal of Physical Therapy Science	Park, J. S. and Choi, J. B. and An, D. H. and Chang, M. Y.	[Purpose] To investigate the effect of mental practice combined with electromyogram-triggered electrical stimulation (MP-EMG ES) on the upper extremity of stroke patients. [Subjects and Methods] Participants were randomly assigned to experimental group or control group. The experimental group received MP-EMG ES plus conventional rehabilitation therapy for 5 days per week for 4 weeks. The control …	Neuromuscular stimulation	upper limb	2017	Korea	40	the Fugl-Meyer Assessment (FMA) and Motor Activity Log (MAL).		2	MP EMG-ES using mentamove	conventional therapy	999	999	0	0	0	0	0	0	0	0	0	0	0	0	0	0	0	0	0	0	0	0	0	0	0	0	0	0	0	1	1	1	0
54	610	rayyan-395827177	Therapeutic Efficacy of Transcutaneous Electrical Nerve Stimulation Acupoints on Motor and Neural Recovery of the Affected Upper Extremity in Chronic Stroke: A Sham-Controlled Randomized Clinical Trial	Healthcare	R, M. Alwhaibi and Mahmoud, N. F. and H, M. Zakaria and W, M. Ragab and Al Awaji, N. N. and M, Y. Elzanaty and H, R. Elserougy	Inability to use the affected upper extremity (UE) in daily activities is a common complaint in stroke patients. The somatosensory system (central and peripheral) is essential for brain reorganization and plasticity. Neuromuscular electrical stimulation is considered an effective modality for improving UE function in stroke patients. The aim of the current study was to determine the therapeutic e…	Neuromuscular stimulation	upper limb	2021	Egypt	40	The Fugl-Meyer Assessment of the upper extremity (FMA-UE), box and block test, (BBT), and quantitative electroencephalogram (QEEG)		2	TST + TENS acupoints	TST + Sham electrical Stimulation)	999	999	1	0	0	0	0	0	0	0	0	0	0	1	0	0	0	0	0	0	0	0	0	0	0	0	0	0	1	1	1	1	0
55	611	rayyan-395827178	Effect of transcranial direct current stimulation on severely affected arm-hand motor function in patients after an acute ischemic stroke	Neurology. Conference: 72nd Annual Meeting of the American Academy of Neurology, AAN	Rabadi, M. and Aston, C.	Objective: The aim of this study was to determine whether cathodal transcranial direct current stimulation (c-tDCS) to unaffected primary motor cortex (PMC) plus conventional occupational therapy (OT) improves functional motor recovery of the affected arm hand in patients after an acute ischemic stroke compared with sham transcranial direct current stimulation plus conventional OT. Background(s):…	Neuromuscular stimulation	upper limb	2020	USA	16	the Action Research Arm Test (ARAT),	the total Functional Independence Measure (TFIM™)	2	c-tDCS plus OT;	s-tDCS plus OT	999	999	1	0	0	0	0	0	0	0	0	0	0	0	0	0	0	0	0	0	0	0	0	0	0	0	0	0	0	1	1	1	0
56	636	rayyan-395831690	Effects of sit-to-stand training combined with transcutaneous electrical stimulation on spasticity, muscle strength and balance ability in patients with stroke: A randomized controlled study	Gait & Posture	Jung, K. S. and In, T. S. and Cho, H. Y.	Sit-to-stand is a fundamental movement of human being for performing mobility and independent activity. However, Stroke people symptoms experience difficulty in conducting the sit-to-stand due to paralysis and especially ankle spasticity. Recently, transcutaneouselectrical- stimulation (TENS) is used to reduce pain but also to manage spasticity. The purpose of this study was to determine (1) whet…	Neuromuscular stimulation	lower limb	2017	Korea	40	Composite Spasticity Score (CSS)	The muscle strength of hip extensor	2	TENS	Sham	999	999	0	0	0	0	0	0	0	0	0	0	0	1	0	0	0	0	0	0	0	0	0	0	0	0	0	0	1	1	1	1	0
57	665	rayyan-395831918	Effects of functional electrical stimulation on gait recovery post-neurological injury during inpatient rehabilitation	Perceptual & Motor Skills	Lairamore, C. I. and Garrison, M. K. and Bourgeon, L. and Mennemeier, M.	This stage 2 trial investigated the therapeutic effect of single channel, peroneal functional electrical stimulation (FES) for improving gait and muscle activity in people with neurological injuries who were enrolled in an inpatient rehabilitation program. Twenty-six patients (16 male; M age = 51.3 yr., SD = 16.2; 2-33 days post-injury) completed the study. Participants were randomly assigned to …	Neuromuscular stimulation	lower limb	2014	USA	32	gait speed, TA muscle activity, and FIM™ locomotion scores.		2	FES	Sham	999	999	0	0	0	0	0	0	0	0	0	0	0	1	0	0	0	0	0	0	0	0	0	0	0	0	1	1	1	1	1	1	0
58	691	rayyan-395827083	Impact of Intensive Gait Training With and Without Electromechanical Assistance in the Chronic Phase After Stroke-A Multi-Arm Randomized Controlled Trial With a 6 and 12 Months Follow Up	Frontiers in Neuroscience	Palmcrantz, S. and Wall, A. and Vreede, K. S. and Lindberg, P. and Danielsson, A. and Sunnerhagen, K. S. and Hager, C. K. and Borg, J.	<b>Introduction:</b> Movement related impairments and limitations in walking are common long-term after stroke. This multi-arm randomized controlled trial explored the impact of training with an electromechanically assisted gait training (EAGT) system, i.e., the Hybrid Assistive Limb<sup> R</sup> (HAL), when integrated with conventional rehabilitation focused on gait and mobility. <b>Material and…	exoskeleton	lower limb	2021	Sweden	48	6 Minute Walk Test (6MWT)		3	Hybrid Assisted Limb on a treadmill	conventtional rehabilitation	no intervention	999	1	0	0	0	0	0	0	0	0	0	0	1	0	0	0	0	0	0	0	0	0	0	0	0	0	0	1	1	1	1	0
59	704	rayyan-395827193	Comparison of three-dimensional, assist-as-needed robotic arm/hand movement training provided with Pneu-WREX to conventional tabletop therapy after chronic stroke	American Journal of Physical Medicine & Rehabilitation	Reinkensmeyer, D. J. and Wolbrecht, E. T. and Chan, V. and Chou, C. and Cramer, S. C. and Bobrow, J. E.	OBJECTIVES: Robot-assisted movement training can help individuals with stroke reduce arm and hand impairment, but robot therapy is typically only about as effective as conventional therapy. Refining the way that robots assist during training may make them more effective than conventional therapy. Here, the authors measured the therapeutic effect of a robot that required individuals with a stroke …	exoskeleton	upper limb	2012	USA	26	FMA-UE		2	the assist-as-needed robot train	Conventional table top therapy	999	999	1	0	0	0	0	0	0	0	0	0	0	0	0	0	0	0	0	0	0	0	0	0	0	0	0	0	1	0	1	0	0
60	711	rayyan-395827213	Robot assisted training for the upper limb after stroke (RATULS): a multicentre randomised controlled trial	Lancet	Rodgers, H. and Bosomworth, H. and Krebs, H. I. and van Wijck, F. and Howel, D. and Wilson, N. and Aird, L. and Alvarado, N. and Andole, S. and Cohen, D. L. and Dawson, J. and Fern and ez-Garcia, C. and Finch, T. and Ford, G. A. and Francis, R. and Hogg, S. and Hughes, N. and Price, C. I. and Ternent, L. and Turner, D. L. and Vale, L. and Wilkes, S. and Shaw, L.	BACKGROUND: Loss of arm function is a common problem after stroke. Robot-assisted training might improve arm function and activities of daily living. We compared the clinical effectiveness of robot-assisted training using the MIT-Manus robotic gym with an enhanced upper limb therapy (EULT) programme based on repetitive functional task practice and with usual care. METHODS: RATULS was a pragmatic,…	exoskeleton	upper limb	2019	United Kingdom	770	action research arm test (ARAT)		3	Robot assisted training	Enhanced upper limb therapy	usual care	999	0	0	1	0	0	0	0	0	0	0	0	1	0	0	0	0	0	0	0	0	0	0	0	0	1	0	1	0	1	0	0
61	717	rayyan-395827255	Comparison of end-effector and exoskeleton devices with robot-assisted gait training in patients with stroke	Journal of Surgery & Medicine (JOSAM)	SarÄ±, Aylin	Background/Aim: Loss of gait is the key problem after stroke. Robotic rehabilitation devices, which constitute the new treatment alternatives for stroke, can be divided into two groups on the basis of their design, the exoskeletons and end-effectors. This study aims to investigate the effects of gait training with two different types of robot on rehabilitation outcomes in patients with stroke. Me…	exoskeleton	lower limb	2021	Turkey	24	10-meter walking test, a 6-minute walking test, the Brunnstrom motor staging, and the Functional ambulation category (FAC)		2	Exoskeleton	End effector	999	999	1	0	0	0	0	0	0	0	0	0	0	1	0	0	0	0	0	0	0	0	0	0	0	1	1	0	1	0	1	0	0
62	722	rayyan-395827287	Central neuroplasticity and lower limbs functional outcome following repetitive locomotor training in chronic stroke patients	PM and R	Shafshak, T. S.	Objective: To explore central neuroplasticity underlying lower limbs functional improvement following repetitive locomotor training by electromechanical gait trainer compared to treadmill with partial body weight support (PBWS) in chronic hemiparetic stroke. Design(s): Randomized, controlled study. Setting(s): Repetitive locomotor training. Participant(s): Fifty chronic hemiparetic stroke patient…	exoskeleton	lower limb	2014	Egypt	50	Fugl-Meyer lower extremity, neuorphysiological assessment		2	electromechanical Gait trainer	Treadmill group	999	999	0	0	0	0	0	0	0	0	0	0	0	1	0	0	0	0	0	0	0	0	0	0	0	0	1	0	1	1	1	0	0
63	742	rayyan-395831554	Robotic-assisted therapy with bilateral practice improves task and motor performance in the upper extremities of chronic stroke patients: A randomised controlled trial	Australian Occupational Therapy Journal	Hsu, H. Y. and Chiu, H. Y. and Kuan, T. S. and Tsai, C. L. and Su, F. C. and Kuo, L. C.	BACKGROUND/AIM: Task-specific repetitive training, a usual care in occupational therapy practice, and robotic-aided rehabilitation with bilateral practice are used to improve upper limb motor and task performance. The difference in effects of two strategies requires exploration. This study compared the impact of robotic-assisted therapy with bilateral practice (RTBP) and usual task-specific train…	exoskeleton	upper limb	2019	Taiwan	43	the amount of use (AOU) and quality of movement (QOM) on the Motor Activity Log (MAL)		2	robotic-assisted therapy with bilateral practice (RTBP)	usual care	999	999	0	0	0	0	0	0	0	0	0	0	0	1	0	0	0	0	0	0	0	0	0	0	0	0	0	0	1	1	1	0	1
64	790	rayyan-395831864	The effects of treadmillwalking combined with obstalce-crossing on walking ability in ambulatory patients after stroke: A pilot randomized controlled trial	European Stroke Journal	Koo, J. W. and Jeong, Y. G.	Background and Aims: Treadmill walking training (TWT) provides greater amount and intensity of stepping practice than conventional walking training in patients with chronic stroke. However, there is not any conclusive evidence regarding the effects of TWT for ambulatory poststroke patients. This study investigated the effects of treadmill walking combined with obstacle-crossing on the walking abi…	exoskeleton	lower limb	2016	Korea	29	the 10-m walk test (10MWT), 6-min walk test (6MWT), Berg Balance Scale (BBS), timed “Up & Go” (TUG) test, and Activities-specific Balance Confidence (ABC) scale		2	Treadmill walking training + Obstacle crossing	treadmillwalking training	999	999	1	0	0	0	0	0	0	0	0	0	0	1	0	0	0	0	0	0	0	0	0	0	0	0	0	0	1	1	1	0	0
65	799	rayyan-395831915	Effect of Transcutaneous Electrical Nerve Stimulation on Plantar Flexor Muscle Spasticity and Walking Speed in Stroke Patients	Physiotherapy Research International	Laddha, D. and Ganesh, G. S. and Pattnaik, M. and Mohanty, P. and Mishra, C.	BACKGROUND AND PURPOSE: Spasticity is a major disabling symptom in patients post stroke. Although studies have demonstrated that transcutaneous electrical nerve stimulation (TENS) can reduce spasticity, the duration of single session TENS is a subject of debate. The purpose of this study was to determine the sustainability of the effects of TENS applied over common peroneal nerve in the reduction…	Electrical Stimulation	lower limb	2016	India	30	ankle plantar-flexor spasticity, passive ankle dorsi-flexion range of motion, clonus and timed up and go test		2	TENS for 30 min and task oriented exercises	task oriented training	999	999	0	0	1	0	0	0	0	0	0	0	0	1	0	0	0	0	0	0	0	0	0	0	0	0	0	0	1	0	0	0	0
66	21	rayyan-333121579	Comparison of the effects of mirror therapy and electromyography-triggered neuromuscular stimulation on hand functions in stroke patients. [Turkish, English]	Turkiye Fiziksel Tip ve Rehabilitasyon Dergisi	Amasyali, S. Y. and Yaliman, A.	Objective: The aim of this study was to determine the effectiveness of the mirror therapy and the electromyography-triggered neuromuscular stimulation on improving the upper extremity functions in patients with subacute stroke in comparison to the conventional therapy as well as to evaluate the advantages of each treatment over another. Materials-Methods: We conducted a prospective, randomized an…	Neuromuscular stimulation	upper limb	2016	Turkey	24	Fugl-Meyer Assessment, wrist range of motion, grip force, Box and Block test		3	Mirror therapy + neuromuscular electro stimulation (NMES)	Mirror therapy	conventional stroke rehabilitation	999	1	0	0	0	0	0	0	0	0	0	0	1	0	0	0	0	0	0	0	0	0	0	0	0	1	0	1	1	0	1	0
67	49	rayyan-908232109	Effect of Neurofeedback Facilitation on Poststroke Gait and Balance Recovery: A Randomized Controlled Trial	Neurology	Mihara, M. and Fujimoto, H. and Hattori, N. and Otomune, H. and Kajiyama, Y. and Konaka, K. and Watanabe, Y. and Hiramatsu, Y. and Sunada, Y. and Miyai, I. and Mochizuki, H.	OBJECTIVE: To test the hypothesis that supplementary motor area (SMA) facilitation with functional near-infrared spectroscopy-mediated neurofeedback (fNIRS-NFB) augments poststroke gait and balance recovery, we conducted a 2-center, double-blind, randomized controlled trial involving 54 Japanese patients using the 3-meter Timed Up and Go (TUG) test. METHODS: Patients with subcortical stroke-induc…	brain stim	lower limb	2021	Japan	54	TUG	FIM, F-M, BBS and gait speed	2	Functional Near Infrared Spectroscopy (fNIRS) Neurofeedback	Sham	999	999	1	0	1	0	0	0	0	0	0	0	0	1	0	0	0	0	0	0	0	0	0	0	0	0	1	0	1	1	1	1	0
68	77	rayyan-908237811	Improvement of Upper Extremity Deficit after Constraint-Induced Movement Therapy Combined with and without Preconditioning Stimulation Using Dual-hemisphere Transcranial Direct Current Stimulation and Peripheral Neuromuscular Stimulation in Chronic Stroke Patients: A Pilot Randomized Controlled Trial	Frontiers in neurology [electronic resource].	Takebayashi, T. and Takahashi, K. and Moriwaki, M. and Sakamoto, T. and Domen, K.	In this study, we investigated the effects of dual-hemisphere transcranial direct current stimulation (dual-tDCS) of both the affected (anodal tDCS) and non-affected (cathodal tDCS) primary motor cortex, combined with peripheral neuromuscular electrical stimulation (PNMES), on the effectiveness of constraint-induced movement therapy (CIMT) as a neurorehabilitation intervention in chronic stroke. …	brain stim	upper limb	2017	Japan	20	fugl-Meyer Assessment for uppler extremity, Motor Activity Log (MAL)		2	Dual-tDCS+ PNMES+ CIMT	Constraint-induced movement therapy (CMIT)	999	999	1	0	0	0	0	0	0	0	0	0	0	1	0	0	0	0	0	0	0	0	0	0	0	0	1	0	1	0	1	1	0
69	100	rayyan-333121636	Effects of low-frequency repetitive transcranial magnetic stimulation on upper extremity motor recovery and functional outcomes in chronic stroke patients: A randomized controlled trial	Somatosensory & Motor Research	Askin, A. and Tosun, A. and Demirdal, U. S.	BACKGROUND: Repetitive transcranial magnetic stimulation (rTMS) was suggested as a preconditioning method that would increase brain plasticity and that it would be optimal to combine rTMS with intensive rehabilitation. OBJECTIVE: To assess the efficacy of inhibitory rTMS on upper extremity motor recovery and functional outcomes in chronic ischemic stroke patients. METHODS: In this randomized cont…	brain stim	upper limb	2017	Turkey	25	Brunnstrom Recovery Stages (BRSs),upper extremity Fugl-Meyer Assessment (UE-FMA), and upperextremity Motricity Index (UE-MI)	the Barthel Index (BI), the ModifiedAshworth Scale (MAS)	3	TMS	TMS+NMES	conventional stroke rehabilitation	999	0	0	0	0	0	0	0	0	0	0	0	1	0	0	0	0	0	0	0	0	0	0	0	0	1	0	1	1	1	1	0
70	213	rayyan-908238034	Effects of transcranial direct current stimulation with virtual reality on upper limb function in patients with ischemic stroke: a randomized controlled trial	Journal of Neuroengineering & Rehabilitation	Yao, X. and Cui, L. and Wang, J. and Feng, W. and Bao, Y. and Xie, Q.	BACKGROUND: Non-invasive brain stimulation techniques have been shown in several studies to improve the motor recovery of the affected upper-limbs in stroke patients. This study aims to investigate whether or not cathodal transcranial direct current stimulation (c-tDCS), combined with virtual reality (VR), is superior to VR alone in reducing motor impairment and improving upper limb function and …	brain stim	upper limb	2020	China	40	FMA-UE	ARAT, BI	2	c-TDCS + VR	Sham tDCS + VR	999	999	1	0	0	0	0	0	0	0	0	0	0	1	0	0	0	0	0	0	0	0	0	0	0	0	1	0	1	1	1	1	0
71	270	rayyan-395831719	Effectiveness of Wii-based rehabilitation in stroke: A randomized controlled study	Journal of Rehabilitation Medicine	Karasu, A. U. and Batur, E. B. and Karatas, G. K.	OBJECTIVE: To investigate the efficacy of Nintendo Wii Fit R-based balance rehabilitation as an adjunc-tive therapy to conventional rehabilitation in stroke patients. METHODS: During the study period, 70 stroke patients were evaluated. Of these, 23 who met the study criteria were randomly assigned to either the experimental group (n = 12) or the control group (n = 11) by block randomization. Prim…	VR	lower limb	2018	Turkey	23	The Berg Balance Scale, Functional Reach Test, Postural Assessment Scale for Stroke Patients, Timed Up and Go Test and Static Balance Index.	postural sway with Emed-X, Functional Independence Measure Transfer and Ambulation scores	2	Wii FIT and Wii balance board + conventional therapy	Conventional therapy	999	999	1	0	0	0	0	0	0	0	0	0	0	1	0	0	0	0	0	0	0	0	0	0	0	0	0	0	1	0	1	0	0
72	281	rayyan-395831830	The effect of virtual reality training on unilateral spatial neglect in stroke patients	Annals of Rehabilitation Medicine	Kim, Y. M. and Chun, M. H. and Yun, G. J. and Song, Y. J. and Young, H. E.	OBJECTIVE: To investigate the effect of virtual reality training on unilateral spatial neglect in stroke patients. METHOD: Twenty-four stroke patients (14 males and 10 females, mean age=64.7) who had unilateral spatial neglect as a result of right hemisphere stroke were recruited. All patients were randomly assigned to either the virtual reality (VR) group (n=12) or the control group (n=12). The …	VR	both	2011	Korea	24	star cancellation test, line bisection test, Catherine Bergego scale (CBS), and the Korean version of modified Barthel index (K-MBI)		2	VR	conventional neglect therapy	999	999	1	0	0	0	0	0	0	0	0	0	0	1	0	0	0	0	0	0	0	0	0	0	0	0	0	0	1	0	1	1	0
73	330	rayyan-908237934	rTMS combined with task-oriented training to improve symmetry of interhemispheric corticomotor excitability and gait performance after stroke: a randomized trial	Neurorehabilitation & Neural Repair	Wang, R. Y. and Tseng, H. Y. and Liao, K. K. and Wang, C. J. and Lai, K. L. and Yang, Y. R.	BACKGROUND: The model of interhemispheric competition after stroke has been established for the upper but not for the lower extremity. Repetitive transcranial magnetic stimulation (rTMS) of the brain has been shown to modulate cortical excitability. OBJECTIVE: The purpose of this study was to investigate the effects of rTMS followed by task-oriented training on cortical excitability and walking p…	Magnetic Stimulation	lower limb	2012	Taiwan	28	corticomotor excitability symmetry and gait symmetry	the Fugl-Meyer assessment (FMA) score and spatial and temporal parameters of gait performance.	2	rTMS+ task oriented treatment	sham rTMS + task oriented treatment	999	999	1	0	0	0	0	0	0	0	0	0	0	1	0	0	0	0	0	0	0	0	0	0	0	0	0	0	1	1	1	1	0
74	375	rayyan-592707970	Error-augmented bimanual therapy for stroke survivors	Neurorehabilitation	Abdollahi, F. and Corrigan, M. and Lazzaro, E. D. C. and Kenyon, R. V. and Patton, J. L.	BACKGROUND: Stroke recovery studies have shown the efficacy of bimanual training on upper limb functional recovery and others have shown the efficacy of feedback technology that augments error. OBJECTIVE: In a double-blinded randomized controlled study (N = 26), we evaluated the short-term effects of bilateral arm training to foster functional recovery of a hemiparetic arm, with half of our subje…	Robotics	upper limb	2018	USA	26	FMA-UE	Wolf Motor function test (WMFT). Box and Blocks assessment, Intrinsic Motivation inventory, Motor Activity Log (MAL)	2	Error Augmentation Treatment	Standard treatment	999	999	1	0	1	0	0	0	0	0	0	0	0	1	0	0	0	0	0	0	0	0	0	0	0	0	1	0	1	1	1	1	0
75	400	rayyan-395831547	Sequencing bilateral robot-assisted arm therapy and constraint-induced therapy improves reach to press and trunk kinematics in patients with stroke	Journal of Neuroengineering & Rehabilitation	Hsieh, Y. W. and Liing, R. J. and Lin, K. C. and Wu, C. Y. and Liou, T. H. and Lin, J. C. and Hung, J. W.	BACKGROUND: The combination of robot-assisted therapy (RT) and a modified form of constraint-induced therapy (mCIT) shows promise for improving motor function of patients with stroke. However, whether the changes of motor control strategies are concomitant with the improvements in motor function after combination of RT and mCIT (RT + mCIT) is unclear. This study investigated the effects of the se…	Robotics	upper limb	2016	Taiwan	34	kinematic variables in a task of reaching to press a desk bell	the Wolf Motor Function Test, Functional Independence Measure, and Nottingham Extended Activities of Daily Living	2	The combination of robot-assisted therapy (RT) and a modified form of constraint-induced therapy (mCIT)	RT only	999	999	0	0	0	0	0	0	0	0	0	0	0	1	0	0	0	0	0	0	0	0	0	0	0	0	0	0	1	1	0	1	0
76	445		Treadmill training to improve mobility for people with sub-acute stroke: a phase II feasibility randomized controlled trial	Clinical Rehabilitation	Baer, G. D. and Salisbury, L. G. and Smith, M. T. and Pitman, J. and Dennis, M.	OBJECTIVE: This phase II study investigated the feasibility and potential effectiveness of treadmill training versus normal gait re-education for ambulant and non-ambulant people with sub-acute stroke delivered as part of normal clinical practice. DESIGN: A single-blind, feasibility randomized controlled trial. SETTING: Four hospital-based stroke units. SUBJECTS: Participants within three months …	Treadmill	lower limb	2018	United Kingdom	77	Rivermead Mobility Index	Functional Ambulation Category, 10-metre walk, 6-minute walk, Barthel Index, Motor Assessment Scale, Stroke Impact Scale and a measure of confidence in walking	2	treadmill training + gait reeducation	gait re-education only	999	999	0	0	0	0	0	0	0	0	0	0	0	1	0	0	0	0	0	0	0	0	0	0	0	0	1	0	1	1	1	1	0
77	521	rayyan-908232121	Ability of electrical stimulation therapy to improve the effectiveness of robotic training for paretic upper limbs in patients with stroke	Medical Engineering & Physics	Miyasaka, H. and Or and , A. and Ohnishi, H. and Tanino, G. and Takeda, K. and Sonoda, S.	We investigated whether untriggered neuromuscular electrical stimulation (NMES) can increase the effectiveness of shoulder and elbow robotic training in patients with hemiparesis. Thirty subacute stroke patients were randomly equally allocated to robot only (RO) and robot and electrical stimulation (RE) groups. During training, shoulder and elbow movements were trained by operating the robotic ar…	Electrical Stimulation	upper limb	2016	Japan	30	Active range of motion (ROM) values of shoulder flexion and abduction, and FMA shoulder/elbow (FMA-SE) and FMA total (FMA-total) s		2	robot+electrical stimulation	robot only	999	999	1	0	0	0	0	0	0	0	0	0	0	1	0	0	0	0	0	0	0	0	0	0	0	0	0	0	1	1	1	1	0
78	528	rayyan-908237823	Five-day course of paired associative stimulation fails to improve motor function in stroke patients	Annals of Physical & Rehabilitation Medicine	Tarri, M. and Brihmat, N. and Gasq, D. and Lepage, B. and Loubinoux, I. and De Boissezon, X. and Marque, P. and Castel-Lacanal, E.	BACKGROUND: Non-invasive brain stimulation has been studied as a therapeutic adjunct for upper-limb recovery in patients with stroke. One type of stimulation, paired associative stimulation (PAS), has effects on plasticity in both patients and healthy participants. Lasting several hours, these effects are reversible and topographically specific. OBJECTIVE: The goal was to investigate the presence…	Electrical Stimulation	upper limb	2018	France	24	motor evoked potential	FMA-UE	2	Peripheral electrical stimulation +cortical magnetic stimulation	Peripheral electrical stimulation +sham cortical magnetic stimulation	999	999	1	0	0	0	0	0	0	0	0	0	0	1	0	0	0	0	0	0	0	0	0	0	0	0	0	0	1	1	0	1	0
79	576	rayyan-908232122	Efficacy of functional neuromuscular electrical Stimulation (FNMES) in the improvement of hand Functions in acute stroke survivals	Nitte University Journal of Health Science	Mohamed Faisal, C. K. and Prakash, P. N. O. and Ajith, S.	Stroke is a worldwide health problem. Hand function is one of the important factors which are affected in stroke. Stroke patients are usually given a conventional physiotherapy but if an additional FNMES is given it might show better improvement. By keeping these facts in view, the present study aims at evaluating and comparing the efficacy of conventional physiotherapy and adding FNMES will make…	Electrical Stimulation	upper limb	2012	India	30	action research arm test (ARAT), BBT		2	functional neuromuscular electrical stimulation	conventional physical therapy	999	999	1	0	0	0	0	0	0	0	0	0	0	0	0	0	0	0	0	0	0	0	0	0	0	0	1	0	0	0	1	0	0
80	588	rayyan-592708035	Transcranial direct current stimulation and EEG-based motor imagery BCI for upper limb stroke rehabilitation	Annual International Conference Of The IEEE Engineering In Medicine And Biology Society	Ang, K. K. and Guan, C. and Phua, K. S. and Wang, C. and Teh, I. and Chen, C. W. and Chew, E.	Clinical studies had shown that EEG-based motor imagery Brain-Computer Interface (MI-BCI) combined with robotic feedback is effective in upper limb stroke rehabilitation, and transcranial Direct Current Stimulation (tDCS) combined with other rehabilitation techniques further enhanced the facilitating effect of tDCS. This motivated the current clinical study to investigate the effects of combining…	Brain-Computer Interface	upper limb	2012	Singapore	5			2	tDCS	sham-tDCS	999	999	0	0	0	0	0	0	0	0	0	0	0	0	0	0	0	0	0	0	0	0	0	0	0	0	0	0	0	0	0	0	0
81	597	rayyan-395827078	Longer versus shorter daily durations of electrical stimulation during task-specific practice in moderately impaired stroke	Archives of Physical Medicine & Rehabilitation	Page, S. J. and Levin, L. and Hermann, V. and Dunning, K. and Levine, P.	OBJECTIVE: To examine and compare efficacy of 30-, 60-, and 120-minute repetitive task-specific practice (RTP) sessions incorporating use of an electrical stimulation neuroprosthesis (ESN) on affected upper-extremity (UE) movement. DESIGN: Prospective, single-blinded, randomized controlled trial. SETTING: Outpatient rehabilitation hospital. PARTICIPANTS: Chronic stroke subjects (N=32) exhibiting …	Neuromuscular stimulation	upper limb	2012	USA	32	FMA-UE	The Arm Motor Ability Test (amat)	4	Electrial stimulation neuroprosthesis+Repetitive Task-specific Practice (30 mins)	ESN+RTP (1Hr)	ESN +RTP (2hrs)	Home exercise programme	0	0	0	0	0	0	0	0	0	0	0	1	0	0	0	0	0	0	0	0	0	0	0	0	1	0	1	1	1	0	0
82	604	rayyan-395827128	The immediate effect of FES and TENS on gait parameters in patients after stroke	Journal of Physical Therapy Science	Park, S. J. and Wang, J. S.	[Purpose] This study was conducted to compare the immediate effects of different electrotherapies on the gait parameters for stroke patients. [Subjects and Methods] Thirty patients with stroke were randomly assigned either to the functional electrical stimulation group or the transcutaneous electrical nerve stimulation group, with 15 patients in each group. Each electrotherapy was performed for 3…	Neuromuscular stimulation	lower limb	2012	South Korea	30	Candance and speed		2	Functional electrial stimulation	Transcutaneous electrical nerve stimulation	999	999	0	0	0	0	0	0	0	0	0	0	0	0	0	0	0	0	0	0	0	0	0	0	0	0	0	0	1	0	0	0	0
83	653	rayyan-395831842	Foot drop stimulation versus ankle foot orthosis after stroke: 30-week outcomes	Stroke	Kluding, P. M. and Dunning, K. and O'Dell, M. W. and Wu, S. S. and Ginosian, J. and Feld, J. and McBride, K.	BACKGROUND AND PURPOSE: Drop foot after stroke may be addressed using an ankle foot orthosis (AFO) or a foot drop stimulator (FDS). The Functional Ambulation: Standard Treatment versus Electric Stimulation Therapy (FASTEST) trial was a multicenter, randomized, single-blinded trial comparing FDS and AFO for drop foot among people >= 3 months after stroke with gait speed <= 0.8 m/s. METHODS: Partic…	Neuromuscular stimulation	lower limb	2013	USA	197	10 meter walk test	FMA-LE, Timed up and go, walking endurance, berg balance scale, functional reach trst, stroke impact scale	2	Foot drop stimulators	ankle foot ortosis	999	999	1	0	1	0	0	1	0	0	1	0	0	1	0	0	0	0	0	1	0	0	0	0	0	0	1	0	1	1	1	1	0
84	713	rayyan-395827216	Slow Versus Fast Robot-Assisted Locomotor Training After Severe Stroke: A Randomized Controlled Trial	American Journal of Physical Medicine & Rehabilitation	Rodrigues, T. A. and Goroso, D. G. and Westgate, P. M. and Carrico, C. and Batistella, L. R. and Sawaki, L.	BACKGROUND AND PURPOSE: Robot-assisted locomotor training on a bodyweight-supported treadmill is a rehabilitation intervention that compels repetitive practice of gait movements. Standard treadmill speed may elicit rhythmic movements generated primarily by spinal circuits. Slower-than-standard treadmill speed may elicit discrete movements, which are more complex than rhythmic movements and involv…	exoskeleton	lower limb	2017	Brazil	20	FAC, timed up and go test, 6-min walk test, 10 min walk test, berg balance score, FMA-LE		2	slow robot assisted Locomotor training on a bodyweight-supported treadmill (LT-BWST)	fast robot-assisted LT-BWST	999	999	1	0	0	0	0	0	0	0	0	0	0	1	0	0	0	0	0	0	0	0	0	0	0	0	1	0	1	1	1	0	0
85	775	rayyan-395831775	Effects of Pedalo<sup> R</sup> training on balance and fall risk in stroke patients	Journal of Physical Therapy Science	Kim, D. Y. and Lim, C. G.	[Purpose] This study sought to examine the effects of Pedalo<sup> R</sup> training on balance and fall risk in stroke patients. [Subjects and Methods] Thirty-one subjects with stroke were recruited and randomly allocated into two groups: the Pedalo<sup> R</sup> group (n=15) and the Treadmill group (n=16). The Pedalo<sup> R</sup> group performed conventional physical therapy program with Pedalo<su…	exoskeleton	lower limb	2017	Korea	31	A Biodex Balance system		2	Stabilize T (Pedalo group)	Treadmill group	999	999	1	0	0	0	0	0	0	0	0	0	0	1	0	0	0	0	0	0	0	0	0	0	0	0	0	0	1	1	0	1	0
86	809	rayyan-395831983	Feasibility and effects of newly developed balance control trainer for mobility and balance in chronic stroke patients: a randomized controlled trial	Annals of Rehabilitation Medicine	Lee, S. H. and Byun, S. D. and Kim, C. H. and Go, J. Y. and Nam, H. U. and Huh, J. S. and Jung, T. D.	OBJECTIVE: To investigate the feasibility and effects of balance training with a newly developed Balance Control Trainer (BCT) that applied the concept of vertical movement for the improvements of mobility and balance in chronic stroke patients. METHOD: Forty chronic stroke patients were randomly assigned to an experimental or a control group. The experimental group (n=20) underwent training with…	exoskeleton	lower limb	2012	Korea	40	the Functional Ambulation Categories (FAC), 10-meter Walking Test (10mWT), Timed Up and Go test (TUG), Berg Balance Scale (BBS), Korean Modified Barthel Index (MBI), and Manual Muscle Test (MMT)		2	Conventional therapy + Balance Control trainer	Conventional therapy	999	999	1	0	0	0	0	0	0	0	0	0	0	1	0	0	0	0	0	0	0	0	0	0	0	0	0	0	1	1	1	1	0
87	817	rayyan-395832016	Efficacy of a Novel Exoskeletal Robot for Locomotor Rehabilitation in Stroke Patients: A Multi-center, Non-inferiority, Randomized Controlled Trial	Frontiers in aging neuroscience	Li, Y. and Fan, T. and Qi, Q. and Wang, J. and Qiu, H. and Zhang, L. and Wu, X. and Ye, J. and Chen, G. and Long, J. and Wang, Y. and Huang, G. and Li, J.	<b>Objective</b>: To investigate the efficacy and safety of a novel lower-limb exoskeletal robot, BEAR-H1 (Shenzhen Milebot Robot Technology), in the locomotor function of subacute stroke patients. <b>Methods</b>: The present study was approved by the ethical committee of the First Affiliated Hospital of Nanjing Medical University (No. 2019-MD-43), and registration was recorded on the Chinese Cli…	exoskeleton	lower limb	2021	China	130	n the 6-minute walking test (6MWT), functional ambulation scale (FAC), Fugl-Meyer assessment lower-limb subscale (FMA_x0002_LE), and Vicon gait analysis		2	BEAR-H1 lower-limb exoskeletal robot was used for locomotor training	Routine training for walking	999	999	1	0	0	0	0	0	0	0	0	0	0	1	0	0	0	0	0	0	0	0	0	0	0	0	1	0	1	1	1	1	0
[truncated: 5 more columns]
